# Supplementary material for: First Investigation of the Optimal Timing of Vaccination of Nile Tilapia (Oreochromis niloticus) Larvae against Streptococcus agalactiae
Source: MDPI journal article supplement (doi:10.3390/vaccines11121753), 2023-11-24

**Supplement material Table S1.**

| Time after<br>Vaccination<br>(h) | Group     | Weight (g)    |               |               |               |               |               |               |
|----------------------------------|-----------|---------------|---------------|---------------|---------------|---------------|---------------|---------------|
|                                  |           | Day 1         | Day 7         | Day 14        | Day 21        | Day 28        | Day 35        | Day 42        |
| 0                                | Control   | 0.011 ± 0.014 | 0.039 ± 0.016 | 0.053 ± 0.011 | 0.110 ± 0.108 | 0.330 ± 0.123 | 0.490 ± 0.128 | 0.580 ± 0.132 |
|                                  | Treatment | 0.011 ± 0.014 | 0.037 ± 0.018 | 0.052 ± 0.010 | 0.108 ± 0.110 | 0.330 ± 0.131 | 0.480 ± 0.111 | 0.580 ± 0.128 |
| 6                                | Control   | 0.012 ± 0.012 | 0.039 ± 0.015 | 0.053 ± 0.019 | 0.120 ± 0.132 | 0.320 ± 0.121 | 0.480 ± 0.161 | 0.590 ± 0.132 |
|                                  | Treatment | 0.011 ± 0.010 | 0.037 ± 0.011 | 0.051 ± 0.021 | 0.112 ± 0.168 | 0.330 ± 0.137 | 0.480 ± 0.223 | 0.570 ± 0.121 |
| 24                               | Control   | 0.011 ± 0.018 | 0.038 ± 0.013 | 0.054 ± 0.017 | 0.110 ± 0.142 | 0.320 ± 0.150 | 0.480 ± 0.164 | 0.590 ± 0.110 |
|                                  | Treatment | 0.011 ± 0.011 | 0.038 ± 0.017 | 0.051 ± 0.019 | 0.110 ± 0.133 | 0.330 ± 0.121 | 0.480 ± 0.158 | 0.570 ± 0.115 |
| 168                              | Control   | 0.025 ± 0.023 | 0.049 ± 0.016 | 0.071 ± 0.014 | 0.260 ± 0.154 | 0.490 ± 0.139 | 0.560 ± 0.190 | 0.620 ± 0.184 |
|                                  | Treatment | 0.028 ± 0.024 | 0.052 ± 0.011 | 0.079 ± 0.016 | 0.310 ± 0.146 | 0.542 ± 0.142 | 0.641 ± 0.165 | 0.731 ± 0.211 |
| 336                              | Control   | 0.036 ± 0.022 | 0.052 ± 0.011 | 0.098 ± 0.027 | 0.320 ± 0.122 | 0.540 ± 0.220 | 0.620 ± 0.134 | 0.750 ± 0.123 |
|                                  | Treatment | 0.038 ± 0.027 | 0.059 ± 0.021 | 0.103 ± 0.014 | 0.450 ± 0.231 | 0.641 ± 0.194 | 0.730 ± 0.207 | 0.821 ± 0.190 |

**Supplement material Table S2.**

| Time after<br>Vaccination<br>(h) | Group     | Total length (cm) |            |            |            |            |            |            |
|----------------------------------|-----------|-------------------|------------|------------|------------|------------|------------|------------|
|                                  |           | Day 1             | Day 7      | Day 14     | Day 21     | Day 28     | Day 35     | Day 42     |
| <b>0</b>                         | Control   | 0.62 ± 0.05       | 0.97 ± 0.1 | 1.25 ± 0.1 | 1.36 ± 0.1 | 1.48 ± 0.1 | 1.62 ± 0.1 | 1.76 ± 0.1 |
|                                  | Treatment | 0.61 ± 0.05       | 0.95 ± 0.1 | 1.25 ± 0.1 | 1.37 ± 0.1 | 1.45 ± 0.1 | 1.61 ± 0.1 | 1.74 ± 0.1 |
| <b>6</b>                         | Control   | 0.64 ± 0.05       | 0.99 ± 0.1 | 1.24 ± 0.1 | 1.36 ± 0.1 | 1.48 ± 0.1 | 1.63 ± 0.1 | 1.74 ± 0.1 |
|                                  | Treatment | 0.63 ± 0.05       | 0.96 ± 0.1 | 1.25 ± 0.1 | 1.37 ± 0.1 | 1.45 ± 0.1 | 1.63 ± 0.1 | 1.74 ± 0.1 |
| <b>24</b>                        | Control   | 0.63 ± 0.05       | 0.98 ± 0.1 | 1.25 ± 0.1 | 1.37 ± 0.1 | 1.49 ± 0.1 | 1.63 ± 0.1 | 1.76 ± 0.1 |
|                                  | Treatment | 0.63 ± 0.05       | 0.95 ± 0.1 | 1.25 ± 0.1 | 1.37 ± 0.1 | 1.45 ± 0.1 | 1.63 ± 0.1 | 1.74 ± 0.1 |
| <b>168</b>                       | Control   | 0.89 ± 0.1        | 1.21 ± 0.2 | 1.32 ± 0.2 | 1.41 ± 0.2 | 1.62 ± 0.2 | 1.73 ± 0.2 | 1.86 ± 0.2 |
|                                  | Treatment | 0.92 ± 0.1        | 1.31 ± 0.1 | 1.43 ± 0.1 | 1.56 ± 0.1 | 1.72 ± 0.1 | 1.83 ± 0.1 | 2.01 ± 0.2 |
| <b>336</b>                       | Control   | 1.10 ± 0.6        | 1.29 ± 0.2 | 1.39 ± 0.1 | 1.49 ± 0.2 | 1.73 ± 0.1 | 1.83 ± 0.2 | 1.94 ± 0.2 |
|                                  | Treatment | 1.30 ± 0.1        | 1.42 ± 0.1 | 1.59 ± 0.1 | 1.67 ± 0.1 | 1.84 ± 0.1 | 1.97 ± 0.2 | 2.18 ± 0.2 |

## Preparation of fish larvae for vaccination experiments and immune response analysis

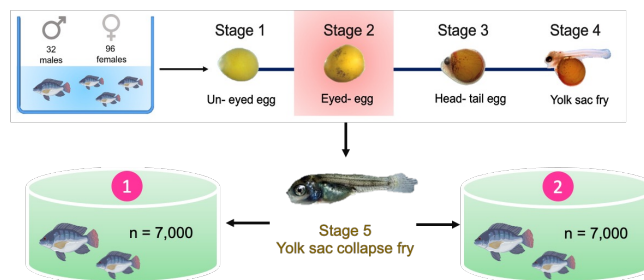

Immune responses of different Nile tilapia larval stages to *S. agalactiae* immersion vaccine (FKV-SA)

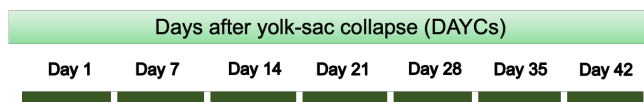

Fish larvae were immunized at each DAYC

Vaccinated group

Non vaccinated group

4 tanks x 7 DAYC periods = 28 tanks

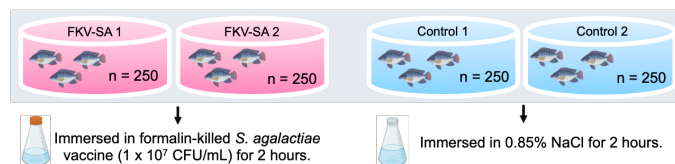

Sampling time points at 0, 6, 24, 168 and 336 hours after vaccination (hav)

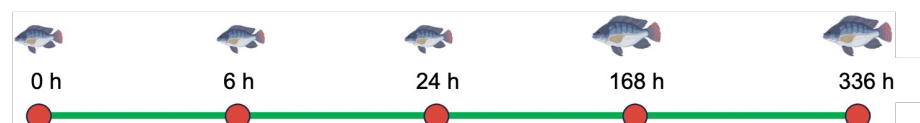

Specific IgM levels by ELISA

Immune-related gene expression by qRT-PCR analysis

Distribution of IgM by immunohistochemistry

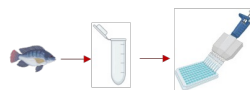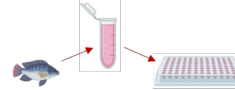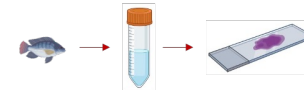

Whole fish from each replicate at 1, 7, 14, 21, 28, 35, and 42 DAYC at 0, 6, 24, 168, and 336 h

Whole fish from each replicate at 21, 28, 35, and 42 DAYC at 24, 168, and 336 h

Whole fish from each replicate at 21, 28, and 35 DAYC at 336 h

# Efficacy of vaccination on disease resistance against *S. agalactiae*

Days after yolk-sac collapse vaccination (DAYCs)

21 DAYC 28 DAYC 35 DAYC 42 DAYC

Non-Vaccinated group

Vaccinated group

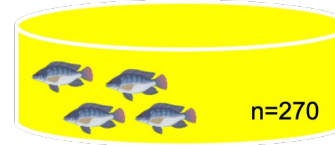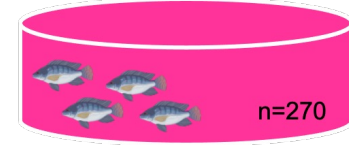

Immersed in PBS for 2 hours.

Immersed in formalin-killed *S. agalactiae* vaccine ( $10^7$  CFU/ml) for 2 hours.

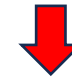

Fish larvae at 21, 28, 35 and 42 DAYCs

Challenges test at 24, 168 and 336 hours after vaccination (h<sub>av</sub>)

24 h 168 h 336 h

Control

Treatment

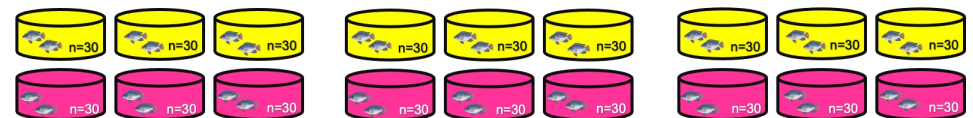

Control (Non-vaccinated group) → Immersed in PBS for 2 hours

Treatment (Vaccinated group) → Immersed in *S. agalactiae* ( $3.44 \pm 1.26 \times 10^5$  CFU/ml) for 2 hours

8 days

Survival rate (%)

Relative percent survival (RPS)

Median lethal concentration (LC<sub>50</sub>)

Experimental groups with 3 replicates (30 fish/replicates)

Control

Treatment

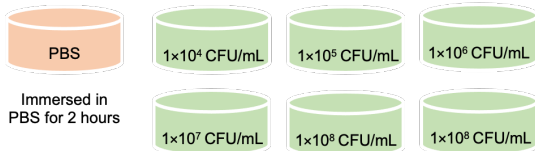

Immersed in *S. agalactiae* at each concentration for 2 hours

LC<sub>50</sub> =  $3.44 \pm 1.26 \times 10^5$  CFU/mL

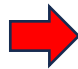

Supplement: s1 [file vaccines-2657163-supplementary.pdf › vaccines-2657163-supplementary.pdf]
